# Supplementary material for: Investigating the Interplay between Nucleoid-Associated Proteins, DNA Curvature, and CRISPR Elements Using Comparative Genomics
Source: PLOS journal article supplement (doi:10.1371/journal.pone.0090940), 2014-03-03
Supplement: S5 (10.1371/journal.pone.0090940.s005) [file journal.pone.0090940.s005]

Table 1. Summary of relationships between a set of control genes and MaxQ\* for the 573-genome sample, proteobacteria sample and  $\gamma$ -proteobacteria sample.

| gene         | Description                                         | Direction | p_value1 | p_value2 | p_value3 |
|--------------|-----------------------------------------------------|-----------|----------|----------|----------|
| <i>aroE</i>  | shikimate dehydrogenase                             | +         | 0.001    | 6.31E-07 | 0.050    |
| <i>leuB</i>  | 3-isopropylmalate dehydrogenase                     | +         | 0.025    | 0.001    | 0.048    |
| <i>mmuM</i>  | homocysteine S-methyltransferase                    | +         | 0.840    | 0.496    | 0.344    |
| <i>astA</i>  | arginine N-succinyltransferase                      | +         | 3.96E-06 | 0.001    | 0.013    |
| <i>hisG</i>  | ATP phosphoribosyltransferase                       | +         | 0.032    | 0.002    | 0.170    |
| <i>aspB</i>  | aspartate aminotransferase                          | -         | 0.015    | 0.001    | 0.003    |
| <i>serC</i>  | PSAT1; phosphoserine aminotransferase               | +         | 2.15E-06 | 0.008    | NA       |
| <i>tyrB</i>  | aromatic-amino-acid transaminase                    | +         | 0.010    | 0.396    | 0.298    |
| <i>lysC</i>  | aspartate kinase                                    | +         | 0.193    | 0.069    | 0.004    |
| <i>ureA</i>  | urease subunit gamma                                | -         | 0.959    | 0.058    | 0.113    |
| <i>paaF</i>  | echA; enoyl-CoA hydratase                           | -         | 0.040    | 0.001    | 0.796    |
| <i>argH</i>  | ASL; argininosuccinate lyase                        | +         | 0.174    | 0.019    | 0.125    |
| <i>hemH</i>  | FECH; ferrochelatase                                | +         | 0.003    | 0.483    | 0.024    |
| <i>paaK</i>  | phenylacetate-CoA ligase                            | -         | 0.565    | 0.077    | 0.658    |
| <i>glnA</i>  | glutamine synthetase                                | +         | 0.435    | 0.227    | 0.217    |
| <i>bioD</i>  | dethiobiotin synthetase                             | +         | 4.19E-06 | 0.002    | 0.123    |
| <i>cobF</i>  | precorrin-6A synthase                               | -         | 0.416    | 0.293    | 0.435    |
| <i>mecR1</i> | methicillin resistance protein                      | -         | 0.025    | NA       | NA       |
| <i>ribB</i>  | RIB3; 3,4-dihydroxy 2-butanone 4-phosphate synthase | +         | 0.004    | 0.002    | 0.007    |
| <i>thiC</i>  | thiamine biosynthesis protein ThiC                  | +         | 0.407    | 0.514    | 0.668    |
| <i>moaD</i>  | molybdopterin synthase sulfur carrier subunit       | +         | 0.0002   | 7.29E-06 | 4.83E-05 |
| <i>cefD</i>  | isopenicillin-N epimerase                           | -         | 0.982    | 0.309    | NA       |
| <i>acdH</i>  | short/branched chain acyl-CoA dehydrogenase         | -         | 0.987    | NA       | NA       |
| <i>spuC</i>  | putrescine aminotransferase                         | -         | 0.516    | 0.061    | 0.104    |
| <i>nicC</i>  | 6-hydroxynicotinate 3-monooxygenase                 | -         | 0.017    | 0.003    | 0.480    |

‘Direction’ indicates a positive or negative relationship between presence of the gene and MaxQ\* (‘+’ means that genomes with the gene have higher mean MaxQ\* than genomes without the gene); P\_value1 refers to the significance of the MaxQ\* differences between genomes that possess a homolog of the gene and those where the homolog is absent in the 573-genome sample, p-value2 in the proteobacteria sample, and p-value3 in the  $\gamma$ -proteobacteria sample. NA indicates that statistical tests cannot be performed due to lack of data.
